# Supplementary material
Source: PubMed Central journal article supplement (PMC7587115)
Supplement: JCM.01668-20-s0001.pdf [file JCM.01668-20-s0001.pdf]

## Supplements

Video S1. Video demonstration of the swab assembly, showing the sequence for wrapping the polyester around the 'barbs' at the swab's tip using the applicator.
